# Supplementary material
Source: Springer Nature journal article supplement (https://www.springermedizin.de/resource/supplementary/12884_2012_598_MOESM2_ESM.pdf/9457848)

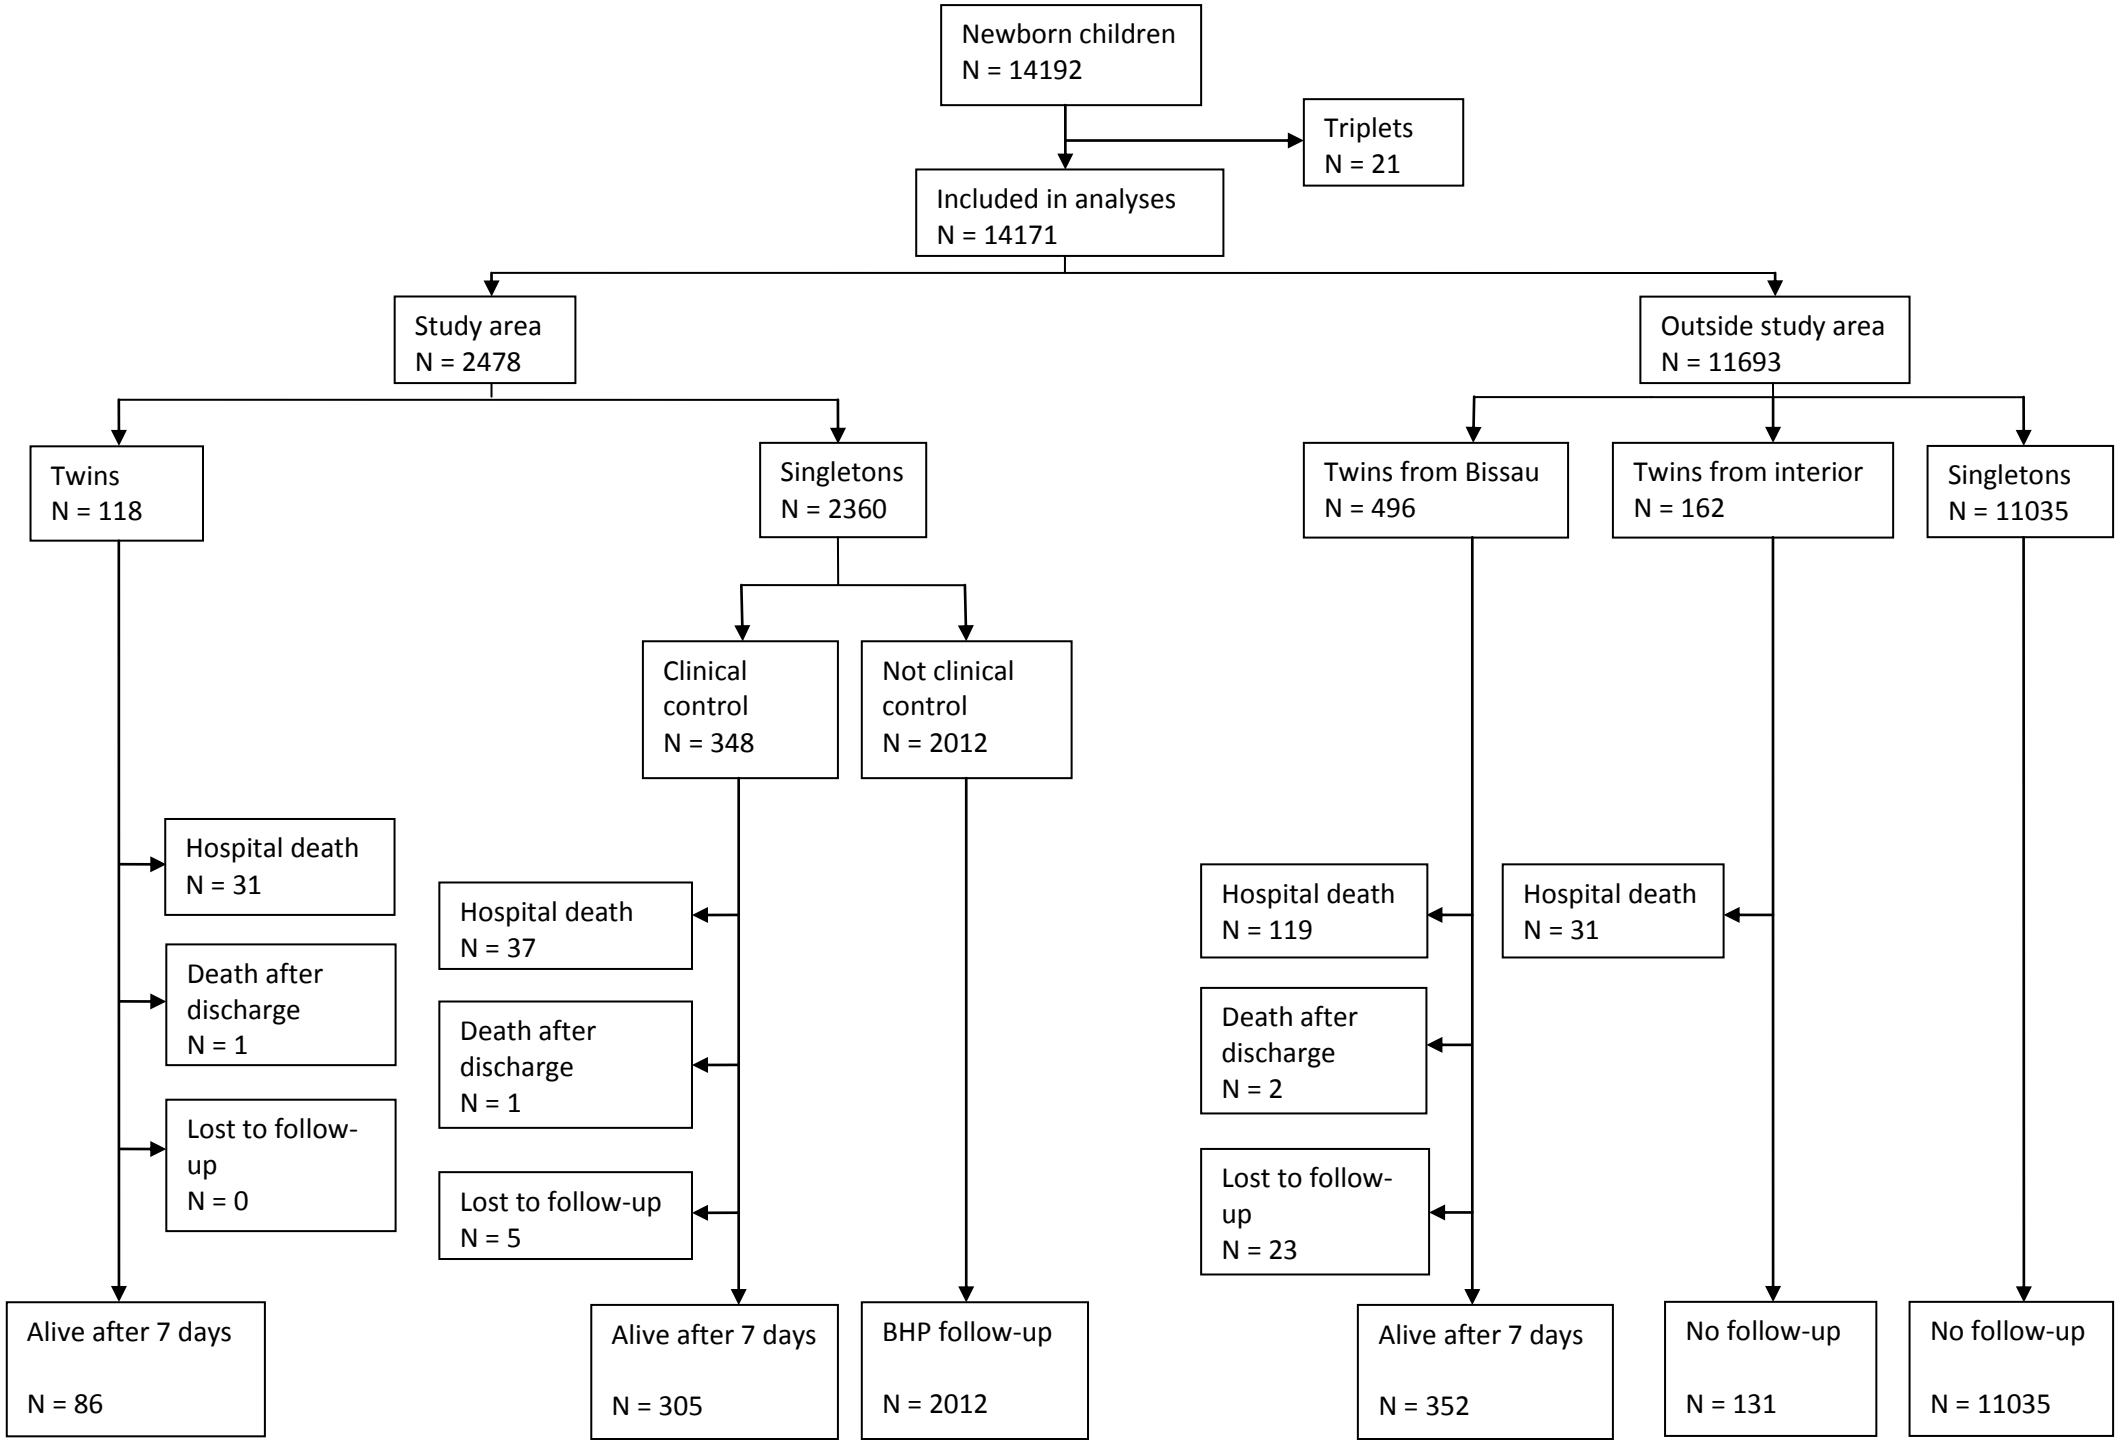

Supplement: MOESM2 [file 9457848]
